# Supplementary material for: Chemically monodisperse tin nanoparticles on monolithic 3D nanoporous copper for lithium ion battery anodes with ultralong cycle life and stable lithium storage properties
Source: Royal Society of Chemistry journal article supplement (doi:10.1039/c8nr09398a), 2019-01-01
Supplement: c8nr09398a1.pdf [file c8nr09398a1.pdf]

## Supplementary Information

### **Chemically monodispersed tin nanoparticles on monolithic 3D nanoporous copper for lithium ion battery anodes with ultralong cycle life and stable lithium storage**

Wenbo Liu,<sup>a,\*</sup> Xue Chen,<sup>a</sup> Peng Xiang,<sup>a</sup> Shichao Zhang,<sup>b</sup> Jiazhen Yan,<sup>a</sup> Ning Li,<sup>a</sup>

Sanqiang Shi<sup>c</sup>

<sup>a</sup> School of Manufacturing Science and Engineering, Sichuan University, Chengdu

610065, China

<sup>b</sup> School of Materials Science and Engineering, Beihang University, Beijing 100191,

China

<sup>c</sup> Department of Mechanical Engineering, The Hong Kong Polytechnic University,

Hung Hom, Kowloon, Hong Kong

Tel: +86-028-85405320; Fax: +86-028-85403408; E-mail: liuwenbo\_8338@163.com.

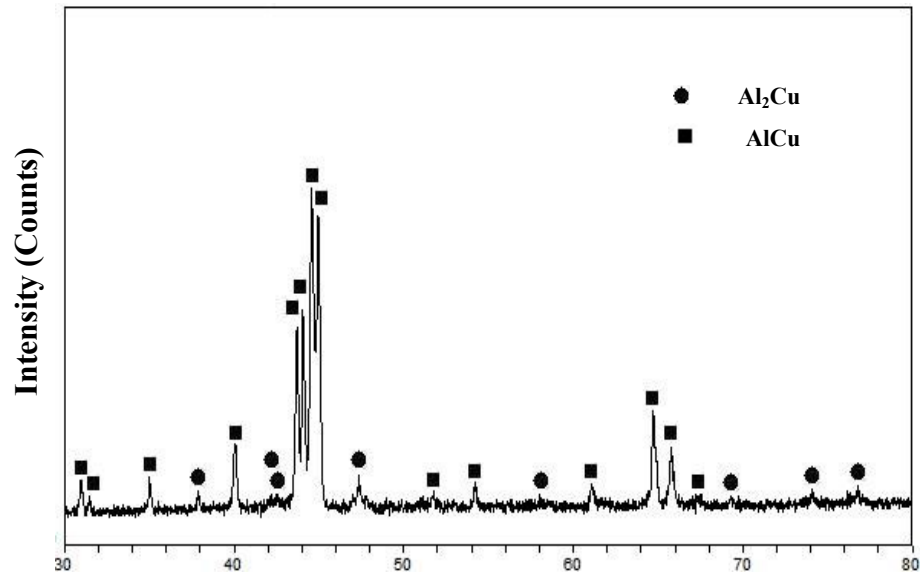

**Figure S1.** The XRD pattern of the initial Al 45 at.% Cu alloy sheets.

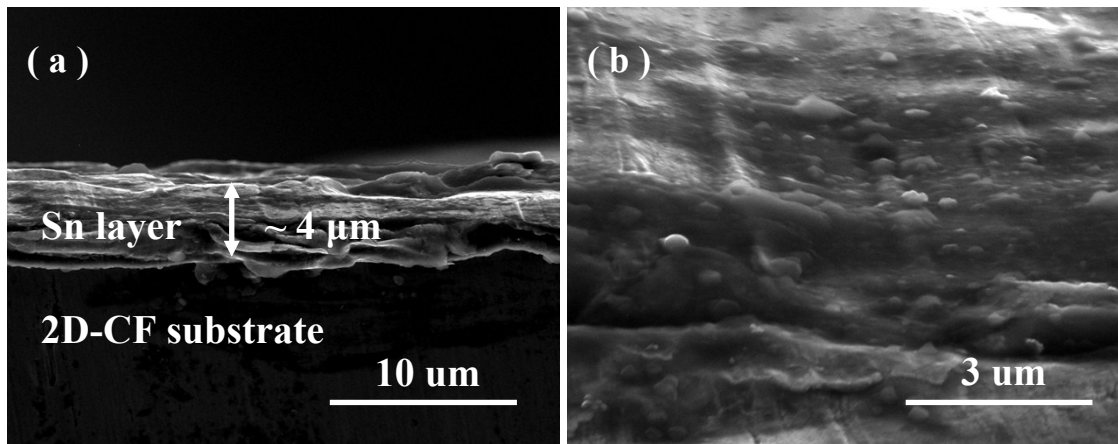

**Figure S2.** SEM images showing the cross-section microstructures of 2D-CF@TTFs composite after electroless plating tin at the low temperature, in which parts b is the high-magnification image.

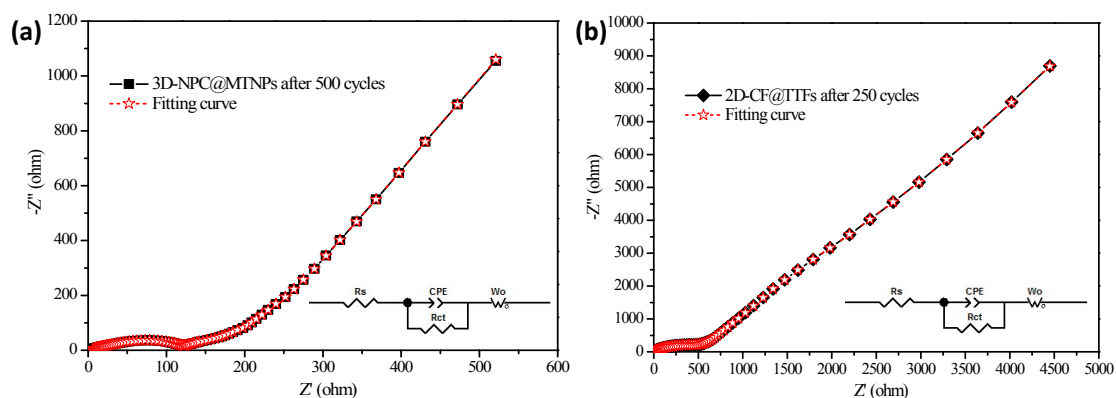

**Figure S3.** Nyquist plots of (a) 3D-NPC@MTNPs electrode after 500 charge-discharge cycles and (b) 2D-CF@TTFs electrode after 250 charge-discharge cycles. The insets in parts a and b are their relevant fitting circuits.

As indicated clearly in Figure S3, the fitting curves of the 3D-NPC@MTNPs and 2D-CF@TTFs electrodes after cyclings are in good agreement with their EIS results. Meanwhile, the equivalent circuits for fitting are displayed in the insets of Figure S3, comprising the typical circuit models including the electrolyte resistance  $R_s$ , charge transfer resistance  $R_{ct}$ , Warburg impedance of  $Li^+$  diffusion in electrode  $W_o$ , and space charge capacitance at electrode/electrolyte interface CPE. The present experimental results reveal the 3D-NPC@MTNPs electrode have significantly lower  $R_s$  (3.1  $\Omega$ ) and  $R_{ct}$  (106  $\Omega$ ) after 500 long-cycles than those of 2D-CF@TTFs electrode just after 250 cycles ( $R_s=5.1$   $\Omega$ ,  $R_{ct}=821$   $\Omega$ ), indicating that the unique 3D-NPC@MTNPs composite as anode for LIBs possesses much better  $Li^+$  and electron transport abilities.

**Table S1.** Chemical composition of the initial Al-Cu alloy sheets by EDX analysis.

| Specimens | Elements (at.%) |
|-----------|-----------------|
|-----------|-----------------|

|                            | Al    | Cu    |
|----------------------------|-------|-------|
| Initial Al-Cu alloy sheets | 54.68 | 45.32 |

**Table S2.** A detailed comparison of lithium storage property of various Sn and Sn-based composites with different structure designs.

| Materials                                              | Structure          | Capacity                   | Cycles | Capacity retention | Ref.     |
|--------------------------------------------------------|--------------------|----------------------------|--------|--------------------|----------|
| Sn                                                     | nanoparticle       | 1.29 mAh cm <sup>-2</sup>  | 100    | 35.4 %             | 1        |
| SnO <sub>2</sub> /Cu <sub>10</sub> Sn <sub>3</sub> /Cu | powder             | 0.25 mAh cm <sup>-2</sup>  | 50     | 45.5 %             | 2        |
| Sn                                                     | nanoparticle       | 0.93 mAh cm <sup>-2</sup>  | 100    | 64.1 %             | 3        |
| SnS <sub>2</sub> /CN                                   | nanoflower         | 0.42 mAh cm <sup>-2</sup>  | 200    | 60.5 %             | 4        |
| Sn/SnO <sub>2</sub>                                    | nanoparticle       | 1.09 mAh cm <sup>-2</sup>  | 100    | 60.2 %             | 5        |
| Sn-Ni                                                  | nanoparticle       | 0.25 mAh cm <sup>-2</sup>  | 200    | 51 %               | 6        |
| SnSb/N-C                                               | nanosheet          | 0.32 mAh cm <sup>-2</sup>  | 100    | 70.6 %             | 7        |
| C@Sn@C                                                 | nanofiber          | 0.14 mAh cm <sup>-2</sup>  | 100    | 62.2 %             | 8        |
| CF/Sn SnO <sub>2</sub> @C                              | submicron particle | 1.84 mAh cm <sup>-2</sup>  | 50     | 76.5 %             | 9        |
| Sn-Cu                                                  | nanotube           | 465 mAh g <sup>-1</sup>    | 100    | 50.5 %             | 10       |
| Cu <sub>6</sub> Sn <sub>5</sub> /Cu                    | nanoporous         | 326 mAh g <sup>-1</sup>    | 50     | 41.5 %             | 11       |
| Sn/C                                                   | nanoparticle       | 284.6 mAh g <sup>-1</sup>  | 250    | 31.1 %             | 12       |
| Sn                                                     | nanoparticle       | 0.485 mAh cm <sup>-2</sup> | 500    | 52.4 %             | Our work |

### References

- 1 Luo et al. *Mater. Lett.*, 2018, **213**, 189-192.
- 2 Park et al. *Appl. Surf. Sci.*, 2017, **399**, 132-138.
- 3 Luo et al. *ACS Appl. Mater. Inter.*, 2018, **10**, 22050-22058.
- 4 Yin et al. *Electrochim. Acta*, 2019, **293**, 408-418.
- 5 Wang et al. *Electrochim. Acta*, 2018, **292**, 72-80.
- 6 Dong et al. *Chem. Eng. J.*, 2018, **350**, 791-798.
- 7 Pan et al. *Chem. Eng. J.*, 2018, **348**, 653 - 660.
- 8 Huang et al. *Chem. Eng. J.*, 2018, **344**, 625 - 632.
- 9 Yang et al. *J. Alloy Compd.*, 2018, **750**, 220-227.
- 10 Xu et al. *Appl. Surf. Sci.*, 2017, **423**, 245-254.
- 11 Xing et al. *Micropor. Mesopor. Mat.*, 2018, **261**, 237-243.
- 12 Guler et al. *Appl. Surf. Sci.*, 2018, **446**, 122-130.
